# Supplementary material
Source: PubMed Central journal article supplement (PMC3029748)
Supplement: 1017006108_pnas.201017006SI.pdf [file 1017006108_pnas.201017006SI.pdf]

# Supporting Information

Kappes et al. 10.1073/pnas.1017006108

## SI Experimental Procedures

**Chromatin Preparation.** A modification of the protocol described in ref. 1 as used to prepare cross-linked chromatin from embryonic progeny from parents of wild-type (*Ore R*) flies at 25 °C. One- to 3.5-h embryos were collected, dechorionated in 50% bleach, washed in PBS (150 mM sodium chloride (NaCl), 10 mM sodium phosphate, pH 7.6) and 0.1% Triton X-100 (PBST), and then ground in homogenization buffer (50 mM Hepes at pH 7.6, 60 mM potassium chloride, 0.25 M sucrose, protease arrest) (786-108; G Biosciences). The homogenate was first clarified by centrifugation at 500 × g for 6 min before the addition of formaldehyde to 1% and a 15-min rotation. Glycine was added to a 250-mM final concentration followed by a 6-min spin at 3,000 × g. Cross-linked chromatin was then washed three times in PBS, resuspended in RIPA buffer (10 mM Hepes, pH 7.6, 1 mM ethylene diamine tetraacetic acid (EDTA), 0.5 mM ethylene glycol tetraacetic acid (EGTA), 140 mM NaCl, 1% Triton X-100, 0.1% Na-deoxycholate, 0.1% SDS), and sonicated to an average length of ~500 bp.

**Chromatin Immunoprecipitations.** Clarified chromatin from ~120  $\mu$ L of starting embryos was split into two and incubated with either anti-Dm or preimmune serum (1) (0.225  $\mu$ L each). Washes were performed as in Alekseyenko et al. (2). Immunoprecipitated material was eluted from the beads by incubation at 37 °C for 1 h in 500  $\mu$ L TE (1 mM EDTA, 10 mM Tris, pH 8.0) containing 0.5% SDS and proteinase K (0.1 mg/mL), followed by 12 h at 65 °C after the addition of NaCl to 0.3 M and SDS to 1%. Samples were then extracted twice with phenol/chloroform before ethanol precipitation in the presence of glycogen.

**Protocol for Quantitative Real-Time PCR.** The iCycler iQ real-time PCR detection system (Bio-Rad) was used to quantitate sequences

in the precipitated DNA from each ChIP fraction. Primer pairs used for PPA and Nop60b have been described (3). *Sxl* primers for -96 were 5'-GCC ACG TTC CAC CTT TCG GC-3' and 5'-TGC GCG TGC CAG TCG CGT GG-3' and +1,171 5'-GTG GTT ATC CCC CAT ATG GC-3' and 5'-GCC AAA GAG GTA TGG GTA GC-3'. To calculate relative enrichment of immune over nonimmune serum, the amount in the ChIP as a percentage of total was used. PCR amplification was performed in triplicate in 20  $\mu$ L SYBR Green qPCR SuperMix (Bio-Rad) on two biological replicates of each ChIP fraction. Dissociation curve analysis was performed at the end of 40 cycles, and quantification was carried out by Bio-Rad comparative  $C_T$  methodology with standard curves constructed for each primer pair with a serial dilution of template DNA, which had PCR efficiencies of 87–97%. An unpaired *t* test was used to determine significance of differences between two samples using GraphPad.

**Embryo Staining.** Collected embryos 0- to 4-h old, paraformaldehyde fixed, were stained with anti-Sxl monoclonal m114 and m5 as described in ref 4. Embryos 0- to 2-h old, collected and then aged 5 h at 25 °C were fixed and stained for  $\beta$ -galactosidase as described in ref 5.

**Fly Stocks.** Most fly stocks are referenced in FlyBase. Stocks used were as follows: w(1)sc(3-1)/FM7c; y(1)w(1)Df(1)Sxl(7B0)/FM7c; y(1)w(1)sis-a(1)/FM7c; dpn(7)/CyO; Sxl(M4)/FM7c; w(1118); P{Sxl Pe3.0 lacZ}; w(1118);P{Sxl Pe0.4lacZ}; w(1118);P{Sxl Pe0.4GOFlacZ}; w(1)snf(1621); Df(1)N71/FM6, y[31d] sc[8] dm [1] B[1]; Df(1)Pgd-kz/FM6, dm[+]; dm(1)/FM7c; w(1)dm(P0)/FM7c; dm(P1)/FM7c; hairy-GAL-4/TM3ser.

1. Maines JZ, Stevens LM, Tong X, Stein D (2004) Drosophila dMyc is required for ovary cell growth and endoreplication. *Development* 131:775–786.
2. Alekseyenko AA, Larschan E, Lai WR, Park PJ, Kuroda MI (2006) High-resolution ChIP-chip analysis reveals that the Drosophila MSL complex selectively identifies active genes on the male X chromosome. *Genes Dev* 20:848–857.
3. Teleman AA, Hietakangas V, Sayadian AC, Cohen SM (2008) Nutritional control of protein biosynthetic capacity by insulin via Myc in Drosophila. *Cell Metab* 7:21–32.

4. Bopp D, Bell LR, Cline TW, Schedl P (1991) Developmental distribution of female-specific Sex-lethal proteins in Drosophila melanogaster. *Genes Dev* 5:403–415.
5. Keyes LN, Cline TW, Schedl P (1992) The primary sex determination signal of Drosophila acts at the level of transcription. *Cell* 68:933–943.

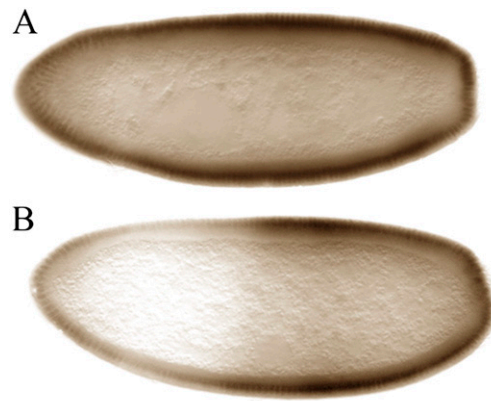

**Fig. S1.** Sxl expression depends on *dm*. Progeny of wild-type parents or of *dm*<sup>1/+</sup> mothers crossed to *dm*<sup>1/Y</sup> fathers were probed with Sxl antibody. Two equal classes of embryos are seen in wild type: no Sxl (male) and (A) a high uniform level of Sxl (female). As in wild type, approximately one-half (48%) of the embryos from the *dm* cross were negative (male). The Sxl<sup>+</sup> embryos fell into three classes: class 1, 13% had a uniform but intermediate level of Sxl compared to wild type; class 2, 15% had an intermediate level of Sxl but the distribution was patchy; and class 3 (B), 24% had a low level of Sxl and the distribution was patchy. On the basis of the frequency of the different classes (and the classes seen when WT females are mated to *dm*<sup>1</sup> males), we believed that embryos in classes 1 and 2 are *dm*<sup>1/+</sup>, whereas embryos in class 3 are *dm*<sup>1/dm</sup><sup>1</sup>.

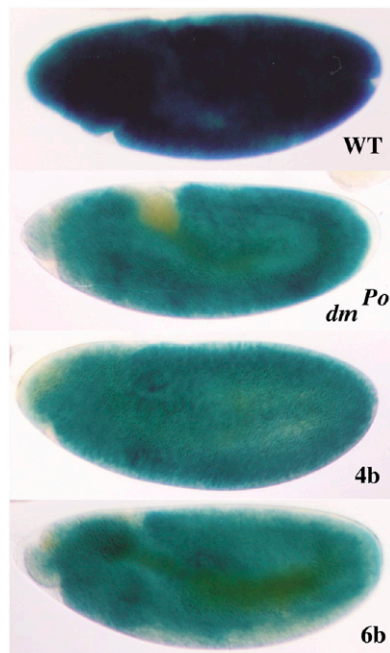

**Fig. S2.** *Sxl*<sup>M4</sup> suppresses the female lethal effects of *dm*<sup>P0</sup> by a mechanism that bypasses the *dm*-dependent defects in *Sxl-Pe* activity. The *hopper* transposon insertion into the male exon in *Sxl*<sup>M4</sup> mutation induces "constitutive" female-specific splicing of the late *Sxl-Pm* pre-mRNAs independent of Sxl protein. However, the mutation has no effect on the expression or splicing of the *Sxl-Pe* mRNAs. Thus, if the female lethal effects of *dm* arise, as we suppose, because the dMyc protein is required to activate *Sxl-Pe*, *Sxl*<sup>M4</sup> must suppress these female lethal effects by a mechanism that bypasses the defects in *Sxl-Pe* activity. To confirm that this is the case, we examined *Sxl-Pe* activity in *dm*<sup>P0/dm</sup><sup>P0</sup> *Sxl*<sup>M4</sup> female embryos. As shown for two of the recombinants, 4b and 6b, the defects in *Sxl-Pe* activity evident in *dm*<sup>P0/dm</sup><sup>P0</sup> are still present in the recombinants, even though they are fully female viable.

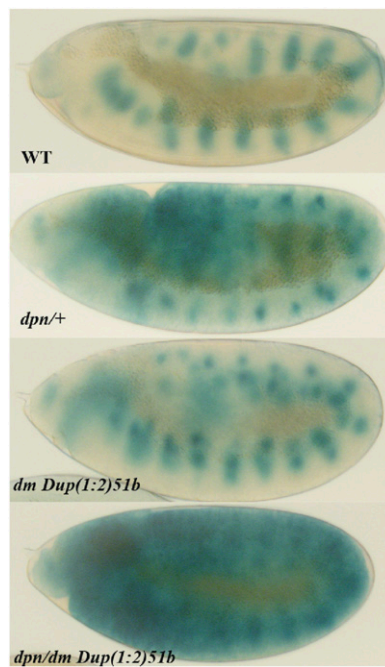

**Fig. S3.** Effects of changing relative dose of *dpn* and *dm* on *Sxl-Pe<sub>5xDbbox</sub>* drives only a very low level of LacZ expression in wild-type females. In embryos heterozygous for *dpn*<sup>7</sup>, where *dm/dpn* ratio is 2/1, *Sxl-Pe<sub>5xDbbox</sub>* activity is up-regulated. In *dm Dup(1:2)51b* embryos, where the *dm/dpn* ratio is 3/2, there is a slight but noticeable increase in *Sxl-Pe<sub>5xDbbox</sub>* activity. *Sxl-Pe<sub>5xDbbox</sub>* drives a much higher level of LacZ expression in *dpn/dm Dup(1:2)51b* embryos where the ratio of *dm/dpn* is 3/1.

**Table S1.** *dm* alleles are female lethal when *trans* to a deficiency or with each other

|                                      | % viability  |
|--------------------------------------|--------------|
| <i>dm<sup>PO</sup>/Df(1)dm75319</i>  | 61 (n = 78)  |
| <i>dm<sup>P1</sup>/Df(1)dm75319</i>  | 21 (n = 138) |
| <i>dm<sup>1</sup>/Df(1)dm75319</i>   | 0 (n = 143)  |
| <i>dm<sup>1</sup>dm<sup>PO</sup></i> | 78 (n = 196) |

Percentage surviving *dm/Df* or *dm<sup>1</sup>/dm* female progeny relative to their *dm/Bal* sibs. *N* indicates the number of *dm/Bal* females scored.

**Table S2.** The constitutively active *Sxl<sup>M4</sup>* mutation rescues the female lethal effects of the *dm<sup>PO</sup>* mutation

|                                             | % viability | <i>n</i> | Female sterile |
|---------------------------------------------|-------------|----------|----------------|
| <i>dm<sup>PO</sup>/dm<sup>PO</sup></i>      | 35          | 646      | Yes            |
| <i>dm<sup>PO</sup>/dm<sup>PO</sup>M4 4b</i> | 98          | 824      | Yes            |
| <i>dm<sup>PO</sup>/dm<sup>PO</sup>M4 5b</i> | 90          | 506      | Yes            |
| <i>dm<sup>PO</sup>/dm<sup>PO</sup>M4 6b</i> | 108         | 238      | Yes            |
| <i>dm<sup>PO</sup>/dm<sup>PO</sup>M4 8b</i> | 102         | 287      | Yes            |

Eleven independent *dm<sup>PO</sup> Sxl<sup>M4</sup>* recombinants were isolated and balanced over *FM7*. Females from the parental *dm<sup>PO</sup>/FM7* stock and recombinant *dm<sup>PO</sup>Sxl<sup>M4</sup>/FM7* stocks were crossed to *dm<sup>PO</sup>/Y* males and the viability of the *dm/dm* females relative to their *dm/FM7* sibs determined. All of the lines gave results similar to those for the four lines shown in this table. For these four lines, we outcrossed the *Sxl<sup>M4</sup>* allele and recovered the *dm<sup>PO</sup>* chromosome as a male viable derivative. For each of these four *Sxl<sup>M4</sup>* lines, several independent outcrossed recombinants (2–5) were tested for female lethal effects. As was observed for the parental *dm<sup>PO</sup>* chromosome, these *Sxl<sup>+</sup>* recombinants are once again female lethal as homozygotes. To further confirm that all 11 *Sxl<sup>M4</sup>dm<sup>PO</sup>* recombinants actually carried *dm<sup>PO</sup>*, we tested for the surviving *dm<sup>PO</sup> Sxl<sup>M4</sup>/dm<sup>PO</sup>* females from the test cross for fertility sterile. As is true for *dm<sup>PO</sup>/dm<sup>PO</sup>* females, the surviving *dm<sup>PO</sup> Sxl<sup>M4</sup>/dm<sup>PO</sup>* females from each of the 11 recombinants were sterile. We also scored for the characteristic *dm* bristle phenotype. *dm<sup>PO</sup> Sxl<sup>M4</sup>*, *dm<sup>PO</sup>* females from all 11 lines had this *dm* phenotype.
